# Identification of N-linked glycans as specific mediators of neuronal uptake of acetylated $\alpha$ -Synuclein

Melissa Birol<sup>1</sup>, Slawomir P. Wojcik<sup>2</sup>, Andrew D. Miranker<sup>2</sup> and Elizabeth Rhoades\*<sup>2,3</sup>

<sup>1</sup>Department of Chemistry, University of Pennsylvania, 231 South 34th Street, Philadelphia, PA 19104

<sup>2</sup>Department of Molecular Biophysics and Biochemistry, Yale University, 266 Whitney Avenue, New Haven CT 06511

<sup>3</sup> Biochemistry and Molecular Biophysics Graduate Group, University of Pennsylvania, 3620 Hamilton Walk, Philadelphia, PA 19104

Character count: 69,403

## Abstract

Cell-to-cell transmission of toxic forms of  $\alpha$ -Synuclein ( $\alpha$ S) is thought to underlie disease progression in Parkinson's disease.  $\alpha$ S in humans is constitutively N-terminally acetylated ( $\alpha$ S<sub>acetyl</sub>), although the impact of this modification is relatively unexplored. Here we report that  $\alpha$ S<sub>acetyl</sub> is more effective at inducing intracellular aggregation in primary neurons than unmodified  $\alpha$ S ( $\alpha$ S<sub>un</sub>). We identify complex N-linked glycans as binding partners for  $\alpha$ S<sub>acetyl</sub>, and demonstrate that cellular internalization of  $\alpha$ S<sub>acetyl</sub> is reduced significantly upon cleavage of extracellular N-linked glycans, but not other carbohydrates. We verify binding of  $\alpha$ S<sub>acetyl</sub> to N-linked glycans *in vitro*, using both isolated glycans and cell-derived proteoliposomes. Finally, we identify neurexin 1 $\beta$ , a neuronal glycoprotein, as capable of driving glycan-dependent uptake of  $\alpha$ S<sub>acetyl</sub>. Importantly, our results are specific to  $\alpha$ S<sub>acetyl</sub> as  $\alpha$ S<sub>un</sub> does not demonstrate sensitivity for N-linked glycans. Our study identifies extracellular N-linked glycans, and neurexin 1 $\beta$  specifically, as key modulators of neuronal uptake of physiological  $\alpha$ S<sub>acetyl</sub> drawing attention to the potential therapeutic value of  $\alpha$ S<sub>acetyl</sub>-glycan interactions.

## Introduction

The pathologies of Parkinson's disease and related synucleinopathies are characterized by the accumulation of aggregates of the neuronal protein  $\alpha$ -Synuclein ( $\alpha$ S) (Goedert, 2001). The prevailing hypothesis is that toxicity is mediated by prefibrillar oligomers of  $\alpha$ S (Luk et al, 2009). Emerging evidence suggests that cell-to-cell transmission of toxic  $\alpha$ S species may be the basis of disease propagation (Guo & Lee, 2014).

$\alpha$ S is a small, soluble protein that is intrinsically disordered in the cytoplasm (Theillet et al, 2016). It binds peripherally to anionic lipid bilayers through its N-terminal domain, which becomes  $\alpha$ -helical upon binding (Dikiy & Eliezer, 2014). The localization of  $\alpha$ S to nerve terminals (Diao et al, 2013; George et al, 1995) and to cellular lipid raft domains (Fortin et al, 2004) suggests there are components or properties of cellular membranes which may be important for  $\alpha$ S binding and function which may not be fully reproduced by simple lipid mixtures. Indeed, specific components of the extracellular membrane, including proteins (Mao et al, 2016) and proteoglycans (Ihse et al, 2017), have been identified as having roles in the uptake of pathogenic  $\alpha$ S species.

$\alpha$ S is subject to various post-translational modifications, including phosphorylation, ubiquitination, glycation, acetylation and arginylation, some of which are correlated with pathology (Beyer & Ariza, 2013; de Oliveira et al, 2017; Vicente Miranda et al, 2017). Mass spectrometry analysis indicates that the majority of these modifications are found on only a very small fraction of  $\alpha$ S (Kellie et al, 2014). N-terminal acetylation, however, is unique in that it is ubiquitously present on  $\alpha$ S *in vivo* (Anderson et al, 2006; de Oliveira et al, 2017), in both healthy persons and Parkinson's disease patients (Anderson et al, 2006; Kellie et al, 2014). In contrast to other protein modifications, including acetylation of side chains, acetylation of the amino terminus occurs co-translationally and is irreversible (Starheim et al, 2012). For many proteins, it is required for recognition of cellular binding partners (Scott et al, 2011). Work from our group (Trexler & Rhoades, 2012) and others have demonstrated that N-terminal acetylation alters the fundamental biophysical properties of  $\alpha$ S; it moderately effects its binding to synthetic lipid bilayers (Dikiy & Eliezer, 2014; Kang et al, 2012) and rates of aggregation (Kang et al, 2012). How this modification impacts interactions with other cellular binding partners, and in particular the plasma membrane proteins which have been identified as receptors involved in cellular uptake and aggregation, has not been explored. Here, we investigate the role of N-terminal acetylation of  $\alpha$ S on cellular internalization and aggregate propagation. Using cell biological and biophysical approaches, we demonstrate that N-terminal acetylation of  $\alpha$ S confers interactions with N-linked glycans relevant to cellular uptake, identify neurexin 1 $\beta$  as a receptor for glycan-dependent uptake of  $\alpha$ S and provide insight into the mechanism of cellular recognition relevant to uptake.

## Results

### **N-terminal acetylation of $\alpha$ S enhances formation of intracellular aggregates in neurons**

Recently observations that exogenously added aggregates of  $\alpha$ S are capable of seeding aggregation of endogenous  $\alpha$ S has prompted an interest in understanding the molecular players involved. However, investigations of this phenomenon have relied on aggregates comprised of unmodified  $\alpha$ S ( $\alpha$ S<sub>un</sub>). To determine whether N-terminal acetylation of  $\alpha$ S ( $\alpha$ S<sub>acetyl</sub>) alters this seeding behavior, primary hippocampal neurons were incubated with pre-formed fibrils (PFFs) of  $\alpha$ S<sub>acetyl</sub> or  $\alpha$ S<sub>un</sub> (Volpicelli-Daley et al, 2014) (Fig EV1). While both  $\alpha$ S<sub>acetyl</sub> and  $\alpha$ S<sub>un</sub> PFFs resulted in the formation of abundant intracellular aggregates (Fig 1A), the kinetics of aggregate

formation differ significantly. For  $\alpha S_{\text{un}}$  PFFs, the time-course was in good agreement with previously published studies (Volpicelli-Daley et al, 2014); aggregates were observed in axons by day 7 and had spread to somatodendritic compartments by day 10. For  $\alpha S_{\text{acetyl}}$  PFFs, aggregates in axons were already prevalent by day 3 and spreading to somatodendritic compartments was readily apparent by day 7. Measurements beyond 7 days were not possible for  $\alpha S_{\text{acetyl}}$  PFFs due to significant cell death.

To compare the effectiveness of  $\alpha S_{\text{acetyl}}$  and  $\alpha S_{\text{un}}$  PFFs in nucleating intracellular aggregate formation and growth, we quantified the total number of aggregates per neuron, reflecting the seeding capacity of the added  $\alpha S$  PFFs (i.e., their ability to induce the initial formation of intracellular  $\alpha S$  aggregates), as well as total aggregate area per neuron, reflecting the overall ability of the added  $\alpha S$  PFFs to accelerate further aggregate growth. This quantification revealed that overall rate of aggregate formation is >2-fold faster for neurons treated with  $\alpha S_{\text{acetyl}}$  PFFs as compared to  $\alpha S_{\text{un}}$  PFFs (Fig 1B). This result demonstrates that  $\alpha S_{\text{acetyl}}$  PFFs are markedly more potent seeds for pathological propagation of  $\alpha S$  aggregation in neurons.

### **$\alpha S_{\text{acetyl}}$ is more rapidly internalized by SH-SY5Y cells than $\alpha S_{\text{un}}$**

This observation sparked our interest in determining the origin in differences in aggregate propagation in neurons. To do so, SH-SY5Y cells were chosen because they retain many of the pathways dysregulated in Parkinson's disease and thus are widely used as a cellular model for disease. SH-SY5Y cells were incubated with monomer or PFF  $\alpha S$  fluorescently labeled with Alexa Fluor 488 ( $\alpha S$ -AL488). After 12 hours of incubation, monomer and PFF  $\alpha S_{\text{acetyl}}$  and  $\alpha S_{\text{un}}$  appeared as puncta, co-localized with an endosomal marker (Fig 2A, 2B, EV2A and EV2B). In order to make a more quantitative comparison of both kinetics and quantity of uptake between  $\alpha S_{\text{acetyl}}$  and  $\alpha S_{\text{un}}$ , cellular internalization was measured as a function of time. Three orthogonal methods were used to quantify uptake: (1) loss of monomer  $\alpha S$  from the cell media was measured using fluorescence correlation spectroscopy (FCS) (LaRoche et al, 2015); (2) the amount of internalized monomer and PFF  $\alpha S$  were quantified by confocal imaging; or (3) both extracellular and internalized monomer and PFF were quantified by polyacrylamide gel electrophoresis (Fig EV3). Results of all three of these approaches are consistent and reveal that both monomer and PFF  $\alpha S_{\text{acetyl}}$  are internalized more rapidly (Fig 2C) and to a greater extent (Fig

2D and EV3) than  $\alpha S_{un}$ . Uptake was inhibited at 4°C, indicating that active endocytotic pathways are required (Fig EV4A). Control measurements made using non-neuronal lineage HEK cells found no internalization of either  $\alpha S_{acetyl}$  or  $\alpha S_{un}$  (Fig EV4B). Both SH-SY5Y and HEK cells showed rapid uptake of transferrin, indicating that lack of  $\alpha S$  internalization is not due to inherent differences in rates of clathrin-dependent endocytosis between the cell lines (Fig EV4C).

### **Cleavage of extracellular N-linked glycans inhibits uptake of $\alpha S_{acetyl}$ by SH-SY5Y cells**

Cell surface heparan sulfate proteoglycans have been observed to facilitate uptake of a number of fibrillar amyloid proteins, including  $\alpha S_{un}$  (Holmes et al, 2013). To investigate the relevance of proteoglycans to  $\alpha S_{acetyl}$  uptake, SH-SY5Y cells were treated with Heparinase I/III, an enzyme that cleaves these carbohydrates, for 6 hours. After exchange of media to remove the enzyme,  $\alpha S$ -AL488 was added and incubated an additional 12 hours. This incubation period was chosen because it allows for reproducible quantification of puncta, and there is no evidence of protein or fluorophore degradation that may occur longer time points (Fig EV2B). In agreement with previous reports, we found that treatment of SH-SY5Y cells with Heparinase reduced the uptake of  $\alpha S_{un}$  PFFs (Fig 2D and EV5A). Interestingly, however, Heparinase pre-treatment did not alter uptake of  $\alpha S_{acetyl}$  PFFs nor that of  $\alpha S_{acetyl}$  monomer (Fig 2D, EV5A and EV5B).

These results prompted us to consider other endoglycosidases, as the majority of cell-surface proteins are post-translationally modified by glycosylation (Moremen et al, 2012), including a number of proteins that have been identified as receptors for  $\alpha S_{un}$  PFFs (Mao et al, 2016; Shrivastava et al, 2015; Urrea et al, 2017). Complex N-linked glycans were selectively removed from SH-SY5Y cells using peptide-N-glycosidase F (PNGase F). Following incubation with  $\alpha S_{acetyl}$ , a decrease in the number of intracellular puncta in the PNGase F treated cells relative to untreated cells was observed, both for monomer and PFF  $\alpha S_{acetyl}$ , reflecting a significant decrease in uptake by deglycosylated cells (Fig 2A, 2C, 2E and EV3). Removal of N-linked glycans was confirmed using concanavalin A (con A), a lectin which binds  $\alpha$ -D-mannose and  $\alpha$ -D-glucose moieties found on N-linked glycans (Fig EV5C). Control measurements showed that PNGase F treatment does not impact clathrin-dependent endocytosis (Fig EV5D). Under our measurement conditions (200 nM protein and 12 hours incubation), neither untreated nor PNGase F-treated cells show evidence of increased toxicity upon incubation with monomer

or PFF  $\alpha S_{\text{acetyl}}$  or  $\alpha S_{\text{un}}$  (Fig EV5E). Moreover, and strikingly, internalization of monomer and PFF  $\alpha S_{\text{un}}$  did not demonstrate any sensitivity to PNGase F treatment (Fig 2B, 2C and 2D). Lastly, we tested endoglycosidase H (Endo H), which cleaves high mannose N-linked carbohydrates and found only a minor impact with this enzyme on uptake of  $\alpha S_{\text{acetyl}}$  by SH-SY5Y cells (Fig EV5B).

Our observations in SH-SY5Y cells were corroborated in cultured primary hippocampal neurons. Monomer and PFF  $\alpha S_{\text{acetyl}}$  and  $\alpha S_{\text{un}}$  are readily internalized by primary hippocampal neurons (Fig 3A and 3B). Removal of extracellular N-linked glycans by PNGase F results in a 10-fold decrease in the amount of internalized  $\alpha S_{\text{acetyl}}$  (Fig 3A), while no effect is observed for  $\alpha S_{\text{un}}$  (Fig 3B). Similar to our measurements in SH-SY5Y cells, PNGase F treatment of neurons causes no defects in clathrin-dependent endocytosis (Fig EV4C).

### **Removal of complex N-linked glycans alters $\alpha S$ binding to SH-SY5Y GPMVs**

Our results thus far support specific interactions between  $\alpha S_{\text{acetyl}}$  and complex, N-linked glycans found on neurons and SH-SY5Y, but not HEK, cells that drive internalization of both monomer and PFF  $\alpha S$ . To investigate the molecular details of the interactions of  $\alpha S$  with cell surface glycans, we used cell membrane-derived giant plasma membrane vesicles (GPMVs) which have a lipid and protein composition that closely resembles the cell plasma membrane (Bauer et al, 2009). Thus they serve as an excellent model of the cell membrane, but lack the active processes of cells, such as uptake, allowing for binding interactions to be observed. GPMVs were harvested from SH-SY5Y cells and incubated with monomer  $\alpha S_{\text{acetyl}}$ -AL488.  $\alpha S_{\text{acetyl}}$  forms large, bright assemblies on the exterior of the SH-SY5Y GPMVs and causes their clustering, with larger assemblies and more clusters observed with increasing protein concentrations (Fig 4A and EV6A). Monomer  $\alpha S_{\text{un}}$ -AL488, on the other hand, binds uniformly (Fig 4B). The images present a striking contrast suggesting differences in binding affinity for  $\alpha S_{\text{acetyl}}$  and  $\alpha S_{\text{un}}$ , which were quantified by FCS (Fig 4C). In these experiments,  $\alpha S$ -AL488 was added GPMVs in a sample chamber and the amount of  $\alpha S$ -AL488 that remained in solution after incubation was determined. After 60 minutes of incubation,  $47 \pm 4\%$  of  $\alpha S_{\text{un}}$  and  $80 \pm 6\%$  of  $\alpha S_{\text{acetyl}}$  were bound to the GPMVs (Fig 4C).

Carbohydrates were selectively removed from the extracellular surface of the SH-SY5Y GPMVs by incubation with the same endoglycosidases previously used in our cell uptake

measurements. Treatment with PNGase F results in a loss of inhomogenous binding and the bright  $\alpha S_{\text{acetyl}}$  assemblies (Fig 4D and EV6B), as well as significantly decreasing the amount of bound  $\alpha S_{\text{acetyl}}$  (Fig 4E). In contrast, binding of  $\alpha S_{\text{un}}$  to SH-SY5Y GPMVs is unaltered by PNGase F treatment (Fig 4B). By comparison, bright  $\alpha S_{\text{acetyl}}$  assemblies are still observed after treatment with Heparinase or Endo H (Fig 4D, 4E and EV6C), consistent with our cellular uptake measurements. Also consistent with our cellular uptake measurements is that only weak binding is observed for  $\alpha S_{\text{acetyl}}$  to GPMVs derived from HEK cells (Fig EV6D).

Uniform binding of Alexa 488 labeled conA (conA-AL488) to SH-SY5Y GPMVs demonstrates that glycoproteins are distributed throughout the GPMV bilayer in the absence of  $\alpha S_{\text{acetyl}}$  (Fig 4F and EV6E); the addition of  $\alpha S_{\text{acetyl}}$  results in clustering of conA-stained proteins (Fig 4F, EV6F and EV6G).  $\alpha S_{\text{acetyl}}$  appears to induce assembly through binding to and cross-linking multiple membrane glycoproteins, likely observed because GPMVs lack an intact cytoskeleton which would restrict large-scale rearrangement of plasma membrane proteins.

### **$\alpha S_{\text{acetyl}}$ binds complex N-linked glycans with a distinct structure**

Because its native function is thought to involve interactions with cellular membranes, binding of  $\alpha S$  to synthetic lipid vesicles has been thoroughly investigated by a number of experimental methods (Eliezer et al, 2001; Kamp & Beyer, 2006; Rhoades et al, 2006). Membrane binding to synthetic lipid vesicles is mediated through the first ~95 residues of  $\alpha S$ , which form an elongated  $\alpha$ -helix upon association (Eliezer et al, 2001; Trexler & Rhoades, 2009). Intramolecular FRET measurements of  $\alpha S$  bound to GPMVs were made;  $\alpha S$  was labeled at residues 9 and 72, positions encompassing much of membrane-binding domain, which we have used previously as a probe of the elongated  $\alpha$ -helical structure (Trexler & Rhoades, 2009). Mean energy transfer efficiencies ( $ET_{\text{eff}}$ ) of  $\alpha S_{\text{acetyl}}$  and  $\alpha S_{\text{un}}$  bound to SH-SY5Y GPMVs, were  $0.43 \pm 0.08$  and  $0.21 \pm 0.06$ , respectively (Fig 5A and 5B). This lower  $ET_{\text{eff}}$  measured for  $\alpha S_{\text{un}}$  is consistent with an elongated helix as measured by single molecule FRET with synthetic lipid bilayers (Trexler & Rhoades, 2009). The higher  $ET_{\text{eff}}$  measured for  $\alpha S_{\text{acetyl}}$  demonstrates that it binds in a distinct conformation. Strikingly, when complex N-linked glycans are removed from the GPMV by treatment with PNGase F,  $ET_{\text{eff}}$  distributions peaked at  $0.19 \pm 0.06$  and  $0.17 \pm 0.03$  are observed for  $\alpha S_{\text{acetyl}}$  and  $\alpha S_{\text{un}}$ , respectively (Fig 5A and 5B). Our interpretation of these findings is that in the absence of complex N-linked glycans,  $\alpha S_{\text{acetyl}}$  binds to GPMVs through

interactions with the lipid bilayer resulting in a predominantly extended conformation. In the presence of N-linked glycans,  $\alpha S_{\text{acetyl}}$  binding is enhanced and it assumes a conformation distinct from the extended, membrane-bound  $\alpha$ -helix. Binding of  $\alpha S_{\text{un}}$ , on the other hand, occurs through its interactions with the lipid bilayer resulting in the extended helical state even in the presence of N-linked glycans. These results provide a basis for understanding why no differences in uptake are observed binding (Fig 3C) or cellular uptake (Fig 2C and 2E) for  $\alpha S_{\text{un}}$  upon PNGase F treatment.

### **$\alpha S_{\text{acetyl}}$ binds isolated N-linked glycans from SH-SY5Y cells**

To identify whether  $\alpha S_{\text{acetyl}}$  binding to glycans requires either the associated glycoproteins or a lipid bilayer, binding of  $\alpha S_{\text{acetyl}}$  to glycans in solution was measured by FCS. SH-SY5Y cells were treated with each of the three endoglycosidases used with the GPMVs, and the cleaved carbohydrates were isolated. The carbohydrates were titrated into  $\alpha S_{\text{acetyl}}$ -AL488 and the autocorrelation curves (Fig EV7A) were fit to extract the diffusion time and average number of fluorescent molecules,  $N$  (Fig 6A and EV7B). The diffusion time, which reflects the hydrodynamic size of the diffusing species, of  $\alpha S_{\text{acetyl}}$  increases more than 25% with increasing concentrations of PNGase F-derived glycans, comparable to con A-AL488 (Fig 6A, 6B and EV7C). No increase in the diffusion time of  $\alpha S_{\text{un}}$  is observed in the presence of PNGase F-derived glycans (Fig 6A). Similarly, the addition of carbohydrates obtained from Endo H or Heparinase treatment of SH-SY5Y cells or PNGase F treatment of HEK cells results in minimal changes in the diffusion time of  $\alpha S_{\text{acetyl}}$  by FCS (Fig 6B and EV7D). NMR measurements show non-uniform glycan dependent changes in  $\alpha S_{\text{acetyl}}$  peak intensity in the presence of PNGase F-cleaved glycans, but not simple carbohydrates (Fig 6C and EV7E). By a filtration-based assay, both monomer and PFF  $\alpha S_{\text{acetyl}}$  are found to pull-down PNGase F-cleaved glycans from solution (Fig EV7F). In contrast to GPMV images, there is no evidence of glycan-mediated assembly of  $\alpha S_{\text{acetyl}}$  in solution (Fig EV7C). This may reflect a difference in  $\alpha S_{\text{acetyl}}$  binding to dispersed glycans in solution compared to the relatively high density of glycans on the GPMV. Alternatively, it could be due to the absence of the relevant glycoprotein(s) as  $\alpha S_{\text{acetyl}}$  binding may involve interactions both with N-linked glycans, as well as their associated glycoproteins.



## Neurexin 1 $\beta$ drives internalization of $\alpha$ S<sub>acetyl</sub>

Our results to this point demonstrate that the uptake of both monomer and PFF  $\alpha$ S<sub>acetyl</sub> by SH-SY5Y cells or primary neurons is strongly impacted by its interactions with complex, N-linked glycans. Our biophysical measurements with GPMVs and isolated carbohydrates support this observation. This prompted us to try to identify a specific glycoprotein capable of binding to  $\alpha$ S<sub>acetyl</sub>. One recent screen of transmembrane proteins identified neurexin 1 $\beta$  and lymphocyte activation gene 3 (LAG3), both of which contain N-linked glycosylation sites in their extracellular domains, as binding partners for  $\alpha$ S<sub>un</sub> (Mao et al, 2016). Although this study did not address the impact of N-terminal acetylation of  $\alpha$ S, nor of glycosylation of the neurexin 1 $\beta$  or LAG3, it found that both receptor proteins exhibit specificity for PFF over monomer  $\alpha$ S<sub>un</sub>, with the effect more striking for LAG3. To specifically address a possible role for glycosylation of these proteins in  $\alpha$ S uptake, HEK cells were transfected with either LAG3 or neurexin 1 $\beta$ , each bearing a GFP tag on its intracellular domain (Fig EV8A).  $\alpha$ S was labeled with Alexa Fluor 594 ( $\alpha$ S-AL594) to allow for simultaneous imaging of the transfected protein and exogenously added  $\alpha$ S. In the absence of LAG3 or neurexin 1 $\beta$ , no uptake of  $\alpha$ S<sub>acetyl</sub> or  $\alpha$ S<sub>un</sub> monomer or PFF by HEK cells was observed (Fig EV4B). At comparable transfection levels, the proteins localized to the plasma membrane, as expected (Fig EV8B). Upon the addition of either  $\alpha$ S<sub>acetyl</sub> or  $\alpha$ S<sub>un</sub> PFFs to LAG3 expressing cells, colocalization with LAG3 on the plasma membrane followed by uptake was observed (Fig 7A). Consistent with the results of the screen which identified these proteins, neither colocalization nor uptake were detected for monomer  $\alpha$ S<sub>un</sub> (Fig7C and EV8C), nor did we observe it for monomer  $\alpha$ S<sub>acetyl</sub> (Fig 7A and 7C). Treatment of the LAG3-expressing cells with PNGaseF did not decrease uptake of  $\alpha$ S<sub>un</sub> or  $\alpha$ S<sub>acetyl</sub> PFFs (Fig 7B and 7C).

The results from the neurexin 1 $\beta$  expressing HEK cells stand in striking contrast. Both monomer and PFF  $\alpha$ S<sub>acetyl</sub> were internalized by these cells where they colocalized in distinct intracellular puncta (Fig 7D and 7F). Intracellular puncta containing neurexin 1 $\beta$  were not observed in the absence of  $\alpha$ S (Fig EV8A), demonstrating that  $\alpha$ S<sub>acetyl</sub> drives internalization of neurexin 1 $\beta$  during its uptake. We saw no evidence of binding or uptake of monomer or PFF  $\alpha$ S<sub>un</sub> in neurexin 1 $\beta$  expressing HEK cells (Fig 7D, 7F and EV8D). Treatment of neurexin 1 $\beta$  transfected HEK cells with PNGase F greatly decreased binding and uptake of  $\alpha$ S<sub>acetyl</sub> monomer and PFF (Fig 7E and 7F). Moreover, neurexin 1 $\beta$  maintained its plasma membrane localization.

These data identify neurexin 1 $\beta$  and its glycosylation as key modulators of pathogenic cell-to-cell transmission of  $\alpha$ S<sub>acetyl</sub>.

## Discussion

In the present study, we present compelling evidence that cellular internalization of  $\alpha$ S<sub>acetyl</sub> by primary neurons and SH-SY5Y cells is dependent upon complex, N-linked glycans.  $\alpha$ S<sub>acetyl</sub> binds to these complex, N-linked glycans in solution and on cell-derived proteoliposomes. Glycan-binding is a novel result for  $\alpha$ S<sub>acetyl</sub> and we propose that it is likely to be critical for recognition of functional protein binding partners. We identify one of those binding partners, neurexin 1 $\beta$ , and show that both its binding to  $\alpha$ S<sub>acetyl</sub> and the consequent uptake of  $\alpha$ S<sub>acetyl</sub> are dependent upon its glycosylation.

Critically, the underlying factor in our discovery is our use of  $\alpha$ S<sub>acetyl</sub> and our ability to make direct comparisons of between  $\alpha$ S<sub>acetyl</sub> and  $\alpha$ S<sub>un</sub>. Although it shown more than ten years ago that  $\alpha$ S<sub>acetyl</sub> is the physiological form of  $\alpha$ S (Anderson et al, 2006) and  $\alpha$ S<sub>acetyl</sub> can be produced in *e. coli* (Trexler & Rhoades, 2012), many studies, including those aimed at understanding function and uptake mechanisms of  $\alpha$ S, still rely on the unmodified protein. Up to 80% of mammalian proteins are modified by N-terminal acetylation and for many, e.g. tropomyosin binding to actin (Hitchcock-DeGregori & Heald, 1987), this modification is required for recognition of binding partners (Drazic et al, 2016). Our current work demonstrates that this is true for  $\alpha$ S<sub>acetyl</sub> and neurexin 1 $\beta$  (Fig 7) and may also be true for other cellular binding partners of  $\alpha$ S. Moreover, the increased uptake (Fig 2 and 3), and the resulting enhancement of intracellular aggregate formation induced by  $\alpha$ S<sub>acetyl</sub> PFFs relative to  $\alpha$ S<sub>un</sub> PFFs (Fig 1) provide compelling evidence that N-terminal acetylation of  $\alpha$ S has physiological consequences which thus far have been overlooked. We anticipate that our results may help reconcile conflicting cellular/animal models with biochemical/biophysical studies of  $\alpha$ S where proteins may lack the appropriate modifications.

Disordered proteins such as  $\alpha$ S<sub>acetyl</sub> often participate in highly specific, but relatively low affinity, interactions (Wright & Dyson, 2015). As such, multivalency provides sufficient avidity for biological interactions between disordered proteins and binding partners *in vivo*, in examples as diverse as tubulin polymerization (Li & Rhoades, 2017), liquid-liquid phase separation (Li et

al, 2012) and nuclear transport (Milles et al, 2015). Intriguingly, interactions between glycan binding proteins, including lectins, and their binding partners are often described in the same terms. The binding between these proteins and a single glycan is often relatively low affinity ( $\mu\text{M}$ - $\text{mM}$ ) (Varki et al, 2009). We estimate the apparent  $K_d$  for monomer  $\alpha\text{S}_{\text{acetyl}}$  and PNGase F-derived glycans from the FCS data shown in Fig. 6a to be  $\sim 10\text{-}20 \mu\text{M}$ . Multivalency both enhances the affinity and confers specificity on the interaction, as high affinity binding only occurs when the correct cluster of glycans is present and in the correct orientation. This requirement may underlie the differences we observe for  $\alpha\text{S}_{\text{acetyl}}$  in its interactions with SH-SY5Y and primary neurons relative to HEK cells. While complex N-linked glycans are abundant on all mammalian cells membranes, there are significant differences in the specific glycome between cell types (Park et al, 2018). Most glycan binding proteins are members of well-characterized families and share similar structures or amino acid sequences (Van Holle et al, 2017). To our knowledge, there are no prior examples of entirely disordered proteins showing selective binding to complex, N-linked glycans, further underscoring the novelty of our results.

Monomer  $\alpha\text{S}$  is disordered in solution, with transient helical structure in the amino terminus (Eliezer et al, 2001). N-terminal acetylation enhances the helical propensity of the first 12 residues of  $\alpha\text{S}$ , as well as exerting long-range effects up through approximately residue 50 (Kang et al, 2011). These changes in conformational sampling conferred by N-terminal acetylation may have a role in the selective glycan binding of  $\alpha\text{S}_{\text{acetyl}}$  relative to  $\alpha\text{S}_{\text{un}}$ . Also relevant to our study, which finds that both monomer and PFF  $\alpha\text{S}_{\text{acetyl}}$  interact with N-linked glycans, the first  $\sim 45$  residues of  $\alpha\text{S}$  remain flexible and extended – and thus presumably available for binding – in fibrillar aggregates (Tuttle et al, 2016). That both monomer and PFF  $\alpha\text{S}_{\text{acetyl}}$  and  $\alpha\text{S}_{\text{un}}$  are internalized by SH-SY5Y cells, while only  $\alpha\text{S}_{\text{acetyl}}$  uptake is impacted by N-linked glycans and only PFF  $\alpha\text{S}_{\text{un}}$  uptake is impacted by Heparinase strongly suggests that there are multiple modes by which  $\alpha\text{S}$  interacts with the extracellular plasma membrane. For  $\alpha\text{S}_{\text{acetyl}}$ , binding to the extracellular membrane is driven by its specific interactions with N-linked glycans. For  $\alpha\text{S}_{\text{un}}$ , binding appears to be derived primarily from interactions with outer leaflet lipids and, for PFF  $\alpha\text{S}_{\text{un}}$ , proteoglycans. In all cases, altering the amount of bound  $\alpha\text{S}$ , whether by cleaving a specific carbohydrate or increasing the amount of glycoprotein (as with neurexin 1 $\beta$ ), correspondingly alters the amount of internalized  $\alpha\text{S}$ .

One consequence of our identification of  $\alpha S_{\text{acetyl}}$  as a glycan binding protein is that it elicits a reconsideration of interactions between  $\alpha S$  and putative binding partners. Many of the proteins identified as such, including glucocerebrosidase (Yap et al, 2011) and Rab3b (Cooper et al, 2006), as well as the LAG3 and neurexin 1 $\beta$  (Mao et al, 2016) examined here, contain N-linked glycosylation sites. Consistent with the description of glycan binding proteins above, our results with LAG3 and neurexin 1 $\beta$  emphasize the relevance of the specific glycans modifying the glycoprotein in determining binding of  $\alpha S_{\text{acetyl}}$ . Both LAG3 and neurexin 1 $\beta$  are modified by N-linked glycans; however, only the glycans on neurexin 1 $\beta$  mediate binding and uptake of  $\alpha S_{\text{acetyl}}$  (Fig 7). As  $\alpha S$  is a major target for drug development to treat Parkinson's disease and other synucleinopathies, identification of  $\alpha S_{\text{acetyl}}$  as a glycan binding protein provides new considerations for therapeutic approaches.

## Material and Methods

**$\alpha S$  expression and purification.**  $\alpha S$  was expressed in *E. coli* BL21 cells; for N-terminally acetylated  $\alpha S$ , BL21 stocks containing the NatB plasmid with orthogonal antibiotic resistance were used. The purification of both acetylated ( $\alpha S_{\text{acetyl}}$ ) and unmodified ( $\alpha S_{\text{un}}$ ) protein was carried out as previously described (Trexler & Rhoades, 2012), with minor modifications. Briefly, two ammonium sulfate cuts were used (0.116 g/mL and 0.244 g/mL) with  $\alpha S$  precipitating in the second step. The pellet was resolubilized in Buffer A (25 mM Tris pH 8.0, 20 mM NaCl, 1 mM EDTA) with 1 mM PMSF and dialyzed against Buffer A to remove ammonium sulfate. Dialyzed samples were then loaded to an anion exchange column (GE HiTrap Q HP, 5ml) and eluted with a gradient to 1 M NaCl.  $\alpha S$  elutes at approximately 300 mM NaCl. Fractions containing  $\alpha S$  were pooled and concentrated using Amicon Ultra concentrators (3000 Da MWCO). Concentrated samples were then loaded to a size exclusion column (GE HiLoad 16/600 Superdex75) and eluted at 0.5 ml/min. Fractions containing  $\alpha S$  were again pooled and concentrated, then stored at  $-80^{\circ}\text{C}$ . All  $\alpha S$  constructs used in this work were checked by MALDI to confirm correct mass and presence of acetylation (Fig EV1).

For NMR measurements,  $^{15}\text{N}$ -labeled  $\alpha S$  was grown in *E. coli* BL21 stocks containing the NatB plasmid in minimal medium (6 g/L  $\text{Na}_2\text{HPO}_4 \cdot 7\text{H}_2\text{O}$ , 3 g/L  $\text{KH}_2\text{PO}_4$ , 0.5 g/L NaCl, 1mM  $\text{MgSO}_4$ , 300  $\mu\text{M}$   $\text{CaCl}_2$ , 0.5 g/L  $^{15}\text{NH}_4\text{Cl}$ ) instead of LB medium and purified as described above.

**$\alpha$ S labeling.**  $\alpha$ S was site-specifically labeled at a single position by introduction of a cysteine at either residue 9 or residue 130. For labeling reactions, freshly purified  $\alpha$ S (typically 200–300  $\mu$ L of  $\sim$ 200  $\mu$ M protein) was incubated with 1 mM DTT for 30 min at room temperature to reduce the cysteine. The protein solution was passed over two coupled HiTrap Desalting Columns (GE Life Sciences) to remove DTT and buffer exchanged into 20 mM Tris pH 7.4, 50 mM NaCl, 6 M guanidine hydrochloride (GdmCl). The protein was incubated overnight at 4 °C with stirring with 4x molar excess Alexa Fluor 488 (AL488) or Alexa Fluor 594 (AL594) maleimide (Invitrogen). The labeled protein was concentrated and buffer exchanged into 20 mM Tris pH 7.4, 50 mM NaCl using an Amicon Ultra 3K Concentrator (Millipore), with final removal of unreacted dye and remaining GdmCl by passing again over a set of coupled desalting columns equilibrated with 20 mM Tris pH 7.4, 50 mM NaCl.

For dual fluorophore labeling for FRET measurements, cysteines were introduced at residues 9 and 72. The protein was labeled as described above, with the following modifications. The protein was first incubated with donor fluorophore AL488 maleimide at a ratio of protein:dye of 1:0.5 for 2 h at room temperature with stirring. Then, 4x molar excess of acceptor fluorophore AL594 maleimide (Invitrogen) was added, and the reaction was continued overnight at 4 °C. The labeled protein was separated from unreacted dye as described above.  $\alpha$ S labeled at these positions have been extensively studied in our lab; as documented in our previous publications, they do not perturb  $\alpha$ S binding to lipid membranes and serve as excellent reporters of different conformations of membrane-associated  $\alpha$ S (Middleton & Rhoades, 2010; Trexler & Rhoades, 2009).

**Fibril Formation.**  $\alpha$ S pre-formed fibrils (PFFs) were prepared as previously described (Volpicelli-Daley et al, 2014). Briefly, 100  $\mu$ M  $\alpha$ S was mixed with 5  $\mu$ M  $\alpha$ S-AL488 in 20 mM Tris pH 7.4 and 100 mM NaCl. To induce aggregation, this solution was incubated at 37°C for 5 days with agitation (1500 rpm on an IKA MS3 digital orbital shaker) in parafilm-sealed 1.5 mL Eppendorf tubes to ensure minimal solvent evaporation. The aggregation reaction was analyzed by Congo Red absorbance by diluting 10  $\mu$ l of the aggregation solution in 140  $\mu$ l 20  $\mu$ M Congo Red. The mature fibrils were then pelleted by centrifugation (13,200 rpm for 90 mins at 4°C) and the supernatant removed. Fibers were resuspended in an equal volume (relative to supernatant) of 20 mM Tris pH 7.4, 100 mM NaCl. Mature fibers were subsequently fragmented on ice using a

sonicator (Diagenode Biorupter<sup>TM</sup> UCD-300 bath sonicator set to high, 30s sonication followed by a delay period of 30s, 10 min total) to form PFFs.

**Assessment of fibrillar material** TEM and PAGE were used to characterize fibrillar  $\alpha$ S (Fig EV1). For TEM, 10  $\mu$ L of aggregated protein samples (from both before and after sonication) were incubated on TEM grids (400-mesh Formvar carbon coated copper, Electron Microscopy Sciences) for 1–2 minutes. Sample solution was wicked with filter paper and grid was washed with water to remove any excess material and improve background contrast. Grids were then incubated with 1% (w/v) aqueous uranyl acetate (UA) solution (10  $\mu$ L) for 30–60 s. Excess UA was wicked away with filter paper and grids were air dried. TEM images were collected using a JOEL JEM 1011 TEM (operating voltage 100 kV) equipped with a charge-coupled device camera (ORIOUS 832. 10W; Gatan). For PAGE, aggregated protein solutions were centrifuged to pellet the aggregated material. The supernatant was removed and pellet was resuspended in the starting volume of buffer. Both supernatant and resuspended pellet (20  $\mu$ L) were loaded on a 4–12% polyacrylamide gel. Gels were imaged using a Typhoon FLA7000 gel imager (GE Life Sciences) using Coomassie stain mode.

**Cell culture.** Human neuroblastoma (SH-SY5Y) and human embryonic kidney 293T (HEK) cells were grown at 37 °C under a humidified atmosphere of 5% CO<sub>2</sub>. The SH-SY5Y cells were cultured in Dulbecco's Modified Eagle's Medium (DMEM) plus 10% fetal bovine serum, 50 U/ml penicillin and 50  $\mu$ g/ml streptomycin. The HEK cells were cultured in DMEM supplemented with 10% FBS, 2mM L-glutamine and 100 units/ml penicillin-streptomycin.

Cells were passaged upon reaching ~95% confluence (0.05% Trypsin-EDTA, Life Technologies), propagated and/or used in experiments. Cells used in experiments were pelleted and resuspended in fresh media lacking Trypsin-EDTA.

**Primary Neuronal Culture.** Primary neuronal cultures were obtained from the Neurons-R-Us facility at the University of Pennsylvania. They were prepared from E15-E17 embryos of CD1 mice. All procedures were performed according to the NIH Guide for the Care and Use of Experimental Animals and were approved by the University of Pennsylvania Institutional Animal Care and Use Committee (IACUC). Dissociated hippocampal neurons were plated onto sterile, poly-D-lysine coated on IBIDI chambers at 200,000 cells/coverslip for live cell imaging and were allowed to mature for 5 days in complete neuronal medium (Neurobasal without phenol

red (Thermo Fisher), 5% B27 supplement (Thermo Fisher). Medium was partially exchanged every 3-4 days.

**Giant Plasma Membrane Vesicles.** Giant plasma membrane vesicles (GPMVs) are blebs obtained directly from the cell plasma membrane that contain lipid bilayers and the embedded membrane proteins, but lack the other biological components of the cell (Bauer et al, 2009). GPMVs were isolated from SH-SY5Y and HEK cells according to established methods (Sezgin et al, 2012). Briefly, cells were plated in 25 cm<sup>2</sup> culture flasks and cultured for 48 h, washed with GPMV buffer (10 mM HEPES, 150 mM NaCl, 2 mM CaCl<sub>2</sub>, pH 7.4) twice and then exposed to 25 mM formaldehyde and 2 mM DTT for 2 h to induce blebbing. To reduce the content of DTT, GPMVs were dialyzed in GPMV buffer prior to use in experiments. GPMVs were also created using *N*-ethylmaleimide as the blebbing reagent, with comparable results. The phospholipid content of final material was measured by total phosphate assay.

**Phosphate assay.** Lipid concentrations for GPMV preparations were estimated by measuring total phosphate, assuming that all measured phosphate is from phospholipids, and that all lipids are phospholipids. This is a practical assumption designed to ensure reproducibility.

**Enzymatic cleavage of carbohydrates.** For cleavage of carbohydrates from GPMVs, endoglycosidases were added to the GPMVs in GPMV buffer at concentrations recommended by the manufacturers (PNGase F - 5,000 units/ml; Endo H - 2500 units; Heparinase I/III - 2500 units) and incubated at 37°C for 6 h. PNGase F was tagged with a chitin binding domain (Remove-IT PNGase F, New England Biolabs, MA, USA). For the images shown in this manuscript, the enzyme was removed by incubation of GPMVs with 50 µl of chitin binding magnetic beads. However, control experiments were conducted without removal of PNGase F and found to be comparable. Cleavage of N-linked glycans by PNGase F was confirmed by comparing images of GPMVs +/- PNGase F treatment after incubation with 50 nM concanavalin A (conA), a lectin which binds to binding to  $\alpha$ -D-mannose and  $\alpha$ -D-glucose moieties, or wheat germ agglutinin, a lectin which binds to N-acetyl-D-glucosamine and sialic acid. A significant decrease in the amount of both proteins is observed in these images (Fig EV6B).

For cleavage of carbohydrates from cells, cells were first plated for 42 h. After 42 h, media was removed from cells and replaced with FBS-free media complimented with the endoglycosidase (PNGase F - 5,000 units/ml; Endo H - 2500 units; heparinase I/II - 2500 units). The cells were

incubated at 37°C under a humidified atmosphere of 5% CO<sub>2</sub> for an additional 6 h. The media was then removed and replaced with cell growth media prior to the addition of  $\alpha$ S. Cleavage of N-linked glycans from cells was confirmed by comparing images +/- PNGase F treatment after incubation with 50 nM conA-AL488, showing a significant reduction in the amount of conA bound (Fig EV5D).

To ensure that PNGase F is removed from GPMVs or cells after incubation (and therefore does not remain associated with either, blocking potential  $\alpha$ S binding sites), we compared the amount of PNGase F added to either GPMVs or cells with that removed after incubation. PNGase F (5,000 units/ml) containing a chitin domain was added to chambers containing either GPMVs or cells and incubated at 37°C for 6 h, as for the experiments described above. After incubation, the buffer or media containing PNGase F was removed incubated with chitin magnetic beads to isolate and concentrate the enzyme. Blank chambers containing only PNGase F in buffer or media were subjected to the same treatment. 20  $\mu$ L of each sample was run on a 4-12% polyacrylamide gels and stained with Coomassie blue. Gels were imaged using a Typhoon FLA7000 gel imager (GE Life Sciences) using Coomassie stain mode. The gels indicate that essentially all of the enzyme is removed (Fig EV9A).

**Quantification of carbohydrates.** Concentrations of carbohydrates isolated from GPMVs or cells were quantified by using the Total Carbohydrate Quantification Assay Kit (Abcam, MA, USA) following the manufacturer's instructions. Briefly, the carbohydrates are first hydrolyzed to monomer sugar units and then converted to furfural or hydrofurfural. These compounds are converted to chromogens, which can be detected by absorbance at 490 nm. Glucose was used to generate a standard curve for calculated of the total carbohydrate concentration of the samples.

**$\alpha$ S-captured carbohydrate pulldown assay.** Carbohydrates cleaved and isolated from GPMVs (50  $\mu$ g) were incubated with 100  $\mu$ M  $\alpha$ S in 100  $\mu$ L 10 mM HEPES, 150 mM NaCl, 2 mM CaCl<sub>2</sub>, pH 7.4 for 1 h at room temperature. Binding reaction mixes were transferred to Amicon Ultra (3000 Da MWCO) centrifugal concentration devices that had been washed with 500  $\mu$ L deionized water. The concentrators were centrifuged for 5 min at 4200 rpm and the filtrates collected. The flow-through contains carbohydrates that did not bind  $\alpha$ S and thus were not retained in the chamber of the concentrator. The amount of carbohydrate in the flow-through was quantified by the total carbohydrate assay as described above. The fraction of carbohydrate



bound and retained by  $\alpha$ S ( $C_{captured}$ ) was calculated relative to the starting concentration (50  $\mu$ g) of the carbohydrate mixture, using;

$$C_{captured} = C_{total} - C_{flow-through} \quad (\text{eq. 1})$$

Where  $C_{total}$  corresponds to the absorption of the starting stock concentration of carbohydrates used and  $C_{flow-through}$  is the absorption of the flow-through.

Samples containing  $\alpha$ S with no glycans or conA with 50  $\mu$ g glycans were used as negative and positive controls, respectively. As expected, no signal at 490 nm was detected for the  $\alpha$ S-only sample; the conA results are shown in Fig EV7F. The absorbance of flow-through at 280 nm was measured, confirming that all protein was retained in the concentrator and could not be detected in the flow-through.

**Cell imaging and analysis.** All cell imaging was carried out by confocal fluorescence microscopy using an Olympus FV3000 scanning system configured on a IX83 inverted microscope platform with a 60x Plan-Apo/1.1-NA water-immersion objective with DIC capability (Olympus, Tokyo, Japan). For all experiments the gain setting for the blue channel was kept constant from sample to sample (excitation 488 nm, emission BP 500-540 nm). For detection of  $\alpha$ S-AL594, the green channel was used (excitation 561 nm, emission BP 570-620 nm). Images were obtained in 8-well ibidi chambers ( $\mu$ -Slide, 8-well glass bottom, ibidi GmbH, Germany) coated with Poly-D-lysine and were seeded with 20000-25000 cells/well. Cells were cultured for 48 h after passage before beginning experiments. For cellular uptake experiments, 200 nM  $\alpha$ S-AL488 was incubated with cells for 0 to 24 h before acquiring images. For experiments using deglycosylated cells, cells were pretreated with the tested endoglycosidase for 6 h as described above prior to addition of protein. For colocalization with lysosomes, cells were treated with 75 nM LysoTracker Deep Red (Life Technologies) for 1 h prior to imaging. For all experiments, the gain setting for each channel was kept constant from sample to sample.

Image acquisition and processing were performed with the software accompanying the FV3000 microscope and Image J software (Schneider et al, 2012). For SH-SY5Y cells, internalized  $\alpha$ S was quantified either by analysis of the punctate structures in the cells or by the total cellular fluorescence; for primary neurons, internalized  $\alpha$ S was quantified by total cellular fluorescence.

For total cellular fluorescence, the integrated fluorescence intensity of the cells is calculated and reported. Cellular puncta were analyzed using the Image J particle analysis plug-in. This algorithm detects puncta through a user-defined threshold and counts the number of puncta that meet or exceed the threshold. The threshold was initially defined by manual identification and averaging of a subset of puncta. Colocalization with lysosomes was computed by obtaining a Pearson coefficient using the ImageJ plugin for co-localization (Coloc\_2).

**Endocytosis inhibition.** For inhibition of exocytosis experiments, monomer  $\alpha$ S-AL488 (200 nM) or PFFs (200 nM in monomer units, 20:1  $\alpha$ S: $\alpha$ S-AL488) was initially incubated with cells for 30 minutes at 4°C. Control cells were moved to 37°C while the endocytosis inhibited cells were incubated at 4°C for another 4 h before acquiring images. For all experiments, the gain setting for each channel was kept constant from sample to sample. Image acquisition and processing were achieved using the software accompanying the FV3000 microscope and Image J software (Schneider et al, 2012).

**GPMV imaging and analysis.** All GPMV images were carried using a PicoQuant MicroTime 200 time-resolved fluorescence system based on an inverted Olympus IX73 microscope (Olympus, Tokyo, Japan) with a 60x Plan-Apo/1.4-NA water-immersion objective using a 482 nm excitation laser and a frame size of 512 × 512 pixels. Images acquired with this instrument were in lifetime mode but were integrated to obtain intensity based images comparable to typical confocal images. This instrument has the advantage of very sensitive avalanche photodiode detectors (SPADs) that are capable at detecting nM concentrations of protein. Fluorescence intensities were analyzed by via the lifetime mode (both intensity and FRET images) using SymPhoTime 64 (PicoQuant). The intensity of images was then adjusted on ImageJ analysis program (Schneider et al, 2012).

For FLIM-FRET experiments, measurements were made of donor-only and donor-acceptor labeled proteins. SPAD signals were processed with the TimeHarp 300 photon counting board and analyzed with the SymPhoTime 64 software (PicoQuant) taking into account the instrument response function to allow consideration of short lifetime components with a high accuracy. FLIM images were acquired for 180 s, with a pixel integration time of 40  $\mu$ s per pixel and an average photon count rate of 10000–30000 counts per second. Regions of interest of the GPMV membrane were selected from FLIM images and fluorescent lifetimes were obtained from

TCSPC decay curves fitted by an exponential equation using the SymPhoTime 64 software. Fitting of the fluorescence images was then performed pixel wise with a single exponential model on all pixels above an intensity threshold of 200 photons. By characterizing donor lifetime in the absence and presence of acceptor, FRET efficiency ( $ET_{eff}$ ) can be calculated from:

$$ET_{eff} = 1 - \frac{\tau_{DA}}{\tau_D} \quad (\text{eq. 2})$$

where  $\tau_{DA}$  and  $\tau_D$  are the donor excited state lifetime in the presence and absence of acceptor. Six FLIM images were recorded for each of three biological repeats per condition. The histograms shown in Fig 5 represents  $ET_{eff}$  values for selected pixels from equatorial sections of the GPMVs as indicated on the images to their left. The histograms were fit with a Gaussian function to extract the mean  $ET_{eff}$ .

Images were obtained in 8-well NUNC chambers (Thermo Scientific, Rochester, NY, USA) coated with Poly-D-lysine, containing 250  $\mu$ l of GMPV at 5  $\mu$ M phospholipid concentration and 80 nM of  $\alpha$ S labeled with Alexa 488. For all experiments using these chambers, the chambers were passivated by polylysine-conjugated PEG treatment to prevent any nonspecific absorption to the chamber surfaces (Middleton & Rhoades, 2010).

**Fluorescence correlation spectroscopy (FCS).** Fluorescence correlation spectroscopy (FCS) measurements were carried out on a lab-built instrument, as described previously (Trexler & Rhoades, 2009). A 488-nm-wavelength laser was adjusted to 5  $\mu$ W prior to entering the microscope. Fluorescence emission was collected through the objective and separated from laser excitation using a Z488RDC Long-Pass Dichroic and an HQ600/200M Band-Pass Filter (Chroma). The fluorescence emission was focused into the aperture of a 50- $\mu$ m-diameter optical aperture fiber (OzOptics) directly coupled to an avalanche photodiode. A digital correlator (Flex03LQ-12; Correlator.com) was used to generate the autocorrelation curves. For each experiment, 30 autocorrelation curves of 10 s each were acquired and averaged together to obtain statistical variations. These average autocorrelation curves were then fit to a function for single fluorescent particles undergoing Brownian motion in a 3D Gaussian volume weighted by the inverse square of the SD:

$$G(\tau) = \frac{1}{N} \times \frac{1}{1 + \frac{\tau}{\tau_D}} \times \sqrt{\frac{1}{1 + \frac{s^2 \tau}{\tau_D}}} \quad (\text{eq. 3})$$

where  $G(\tau)$  is the autocorrelation function for translational diffusion as a function of time  $\tau$ ,  $N$  is the average number of fluorescent molecules in the laser focal volume, and  $\tau_D$  is the translational diffusion time of the particles. The structure factor,  $s$ , is the ratio of the radial to axial dimensions of the focal volume and was obtained from a calibration procedure using Alexa 488 hydrazide dye solutions ( $s = 0.2$ ) and fixed for all subsequent fitting. Several datasets of autocorrelation curves obtained in the presence of carbohydrates were analyzed considering a single component system. For carbohydrate binding, both the diffusion time,  $\tau_D$ , (Fig 6A, 6B, EV7A, EV7C and EV7D) and the number of molecules,  $N$ , (Fig 4C, 4E and EV7B) were analyzed.

**GPMV binding and cellular uptake by FCS.** FCS was used to monitor  $\alpha S$  both binding to GPMVs and uptake by cells. FCS measurements were made on the instrument described above. For GPMV binding, experiments were performed in 8-well NUNC chambers (Thermo Scientific, Rochester, NY, USA) containing 250  $\mu$ l of GMPV at 5  $\mu$ M phospholipid concentration. The laser focal volume was located to a height of 100  $\mu$ m from the bottom surface of the wells, above all GMPVs.  $\alpha S$  labeled with Alexa 488 (80 nM) was added to wells with GPMVs and the autocorrelation measurements were taken immediately and after 60 minutes. Each curve was integrated for 30 s, repeated 10 times and data was analyzed as described above. Binding was quantified by measuring the change in the number of molecules,  $N$ , of fluorescently labeled  $\alpha S$  present in the solution surrounding the GMPVs relative to the starting concentration. There was no change in the diffusion time of the  $\alpha S$  that remained in the cell media over this time course, evidence that protein is stable and the fluorophore intact (Fig EV9B).

For cell uptake experiments, cells were plated in phenol red-free medium in 8-well ibidi chambers ( $\mu$ -Slide, 8-well glass bottom, ibidi GmbH, Germany) coated with Poly-D-lysine wells and cultured for 48 h prior to measurements. Control wells contained the same volume of media without cells; these control for non-specific adsorption of protein to the well surfaces.  $\alpha S$ -AL488 (200 nM) was added to the wells at the start of the experiment, and the autocorrelation curves were taken in the medium well above the cells, at a height of 100  $\mu$ m from the bottom surface of the wells. The curves were collected at regular intervals, over a period ranging from 2 to 24 h, and each autocorrelation curve integrated for 30 s, repeated 10 times. Data were analyzed as described above. Cellular uptake was assessed by measuring the change in the number of molecules of fluorescently labeled  $\alpha S$  present in the media surrounding the cells relative to the

starting concentration. In between measurements, the chambers were returned to the incubators to maintain the temperature in the wells at 37°C. As a negative control for both the GPMV binding and cell uptake studies, GPMVs or cells were incubated with 80 nM eGFP. There was no evidence of eGFP binding to the GPMVs nor of internalization by SH-SY5Y cells (Fig EV9C).

**Cellular uptake by PAGE.** As an orthogonal approach to the FCS and imaging approaches described above, uptake of both monomer and PFF  $\alpha$ S were quantified by PAGE. SH-SY5Y cells were incubated with 200 nM  $\alpha$ S, as described above for FCS uptake experiments. After incubation for the desired time (1, 3, 5, 8, 12, or 24 h) the media was removed from cells and stored at 4°C. After all samples were collected, 20  $\mu$ l of each sample were run on a 4-12% polyacrylamide gel.

To quantify the amount of protein internalized, an identical set of experiments was carried out, with modifications as described in the following. For each time point, transferrin-AL488 (100 nM) was added 30 min prior to the due time of the time point to serve as a loading control. At the desired time points, the cells were detached from the wells by 0.05% Trypsin-EDTA (Life Technologies), pelleted and lysed in 250  $\mu$ l RIPA lysis buffer (Thermo Fisher). Cell lysates (20  $\mu$ l of stock) were run on PAGE gels. Cell lysates (20  $\mu$ l) were run on 4-12% polyacrylamide gels.

Gels of both extracellular and internalized  $\alpha$ S were imaged using a Typhoon FLA7000 gel imager (GE Life Sciences) using fluorescent imaging mode to detect  $\alpha$ S-AL488 or transferrin-AL488. Image J was used to quantify the bands.

**Statistical analysis.** Data are expressed as the mean  $\pm$  SD and were examined by a one-way analysis of variance ( $n=3$ ). More than three experiments were performed and similar results were obtained. P values less than 0.05 were considered to be significant.

**Trypan Blue Quenching.** Trypan blue solution 0.4% (Thermo Fisher) and fresh neurobasal without phenol red, B27, or antibiotic supplementation were equilibrated at 37°C. A 10X dilution of trypan blue was prepared freshly in the warmed neurobasal media. The trypan blue solution was then added to cells dropwise and incubated at 37°C for an hour prior to imaging. Trypan Blue quenching was performed for all imaging experiments performed using PFFs and when monomer protein was introduced in experiments utilizing primary neurons. Trypan Blue

quenching was used to eliminate signal from extracellular material allowing the fluorescence quantification of intracellular fluorescence signal.

**Propagation of amyloid in primary neurons.** Primary wild type mouse hippocampal neurons (obtained as described above) were grown for 6 days on round coverslips prior to addition of  $\alpha$ S<sub>acetyl</sub> or  $\alpha$ S<sub>un</sub> PFFs (100 nM final PFF concentration). Cells were fixed with 4% (wt/vol) paraformaldehyde and co-stained with antibodies specific to  $\alpha$ S phosphorylated at serine 129 (rabbit monoclonal phospho 129, 1:250 dilution) and neuronol tubulin (mouse monoclonal anti- $\beta$ -III tubulin, 1:100 dilution) after 3-, 7- and 10-days incubation with PFFs. Primary antibodies were visualized by secondary staining with Alexa Fluor 488 donkey anti-rabbit IgG (Invitrogen) and Alexa Fluor 647 goat anti-mouse IgG (Invitrogen) (1:1000 dilution).

**Transfection of HEK cells.** HEK cells were transfected with plasmid encoding LAG3-GFP or Neurexin 1  $\beta$ -GFP by Lipofectamine 3000, following manufacturer's directions. The media was removed from cells 48 h after transfection and replaced with FBS-free media complimented with PNGaseF (5,000 units/ml) for experiments that required PNGaseF treatment. The cells were then incubated at 37°C under a humidified atmosphere of 5% CO<sub>2</sub> for an additional 6 h. The media was then removed and replaced with cell growth media prior to the addition of  $\alpha$ S. Cells were incubated with monomer  $\alpha$ S labeled with Alexa 594 (final concentration 200 nM) or PFF  $\alpha$ S (final concentration 200 nM monomer units, 1:20 labeled:unlabeled) for 12 h prior to imaging.

**Flow cytometry.** To quantify LAG3-GFP and Neurexin 1  $\beta$ -GFP expression levels, HEK cells were plated and transfected as above. Following 48 h, cells were detached using 0.05% Trypsin-EDTA, centrifuged and washed with PBS + 2mM EDTA and 2% BSA. The cells were then treated with the Zombie Yellow fixable cell viability kit (BioLegend) at room temperature in PBS + 2mM EDTA for 20 mins and then fixed at 4 °C using Cytfix for 20 mins. Cells were then placed in PBS + 2mM EDTA and 2% BSA. Data were collected on an LSR II flow cytometer (BD Biosciences) and post-collection data were analyzed using FlowJo (Treestar).

**Nuclear Magnetic Resonance.** <sup>1</sup>H-<sup>15</sup>N HSQC NMR titrations were carried out at 25°C using Varian 600 MHz or Agilent 800 MHz spectrometers equipped with room temperature probes. A

uniformly labeled  $^{15}\text{N}$ - $\alpha\text{S}$  solution was added to either N-linked glycans obtained by PNGaseF cleavage from SH-SY5Y cells or commercially available mono- or trisaccharides at the concentrations indicated in Fig 6C and EV7E in GPMV buffer (10 mM HEPES, 150 mM NaCl, 2 mM  $\text{CaCl}_2$ , pH 7.4, 10%  $\text{D}_2\text{O}$ ; final concentration of  $^{15}\text{N}$ - $\alpha\text{S}$  was 350  $\mu\text{M}$ ). HSQC spectra were collected with VnmrJ software using built-in pulse sequence including WATERGATE solvent suppression and analyzed with Mnova software suite (Mestrelab). Standard parameters for zero-filling, apodization and baseline correction were applied.  $^1\text{H}$  chemical shifts were referenced using water resonance and  $^{15}\text{N}$  chemical shifts were referenced indirectly based on gyromagnetic ratios of respective nuclei. Previously assigned  $\alpha\text{S}$  backbone resonances were used (Kang et al, 2011).

Binding to the PNGaseF derived glycans results in non-uniform peak intensity increases throughout the sequence of  $\alpha\text{S}$ . For analysis, 10 peaks showing large increases and 10 peaks showing small or no increases were selected to roughly cover the entire sequence. The same residues were used for each analyzed dataset. For each set of peaks, the relative magnitude of increase (as compared to  $\alpha\text{S}$  in solution without glycans) expressed as a percentage was calculated and averaged. A difference between two numbers is reported in Fig 6C of the manuscript. The same calculation was carried out for the mono- and tri-saccharides, which do not bind to  $\alpha\text{S}$ , shown in Fig. EV7E.

### **Acknowledgments**

This research was supported by NIH R01 NS079955 and the Michael J. Fox Foundation (to E.R.). We thank T. Baumgart for use of his confocal microscope, V. M.-Y. Lee for use of her sonicator, M. Maronski of the Neurons R Us Culture Service Center at Penn Medicine Translational Neuroscience Center (PTNC) at the University of Pennsylvania for hippocampal neuron preparation, J. Wang for advice on the neuron propagation assay, J. Doerner for the use of the flow cytometry and R. Jin for providing the vesicle schematic adapted for Fig 5. All data are available from authors by request.

### **Author contributions**

M.B. and E.R. designed and conceived the experiments. M.B. performed all measurements on GPMVs, cells, and isolated glycans. S.P.W performed the NMR experiments in consultation with A.D.M. All figures and text were prepared by M.B. and E.R.

### **Competing interests**

The authors declare that no competing interests exist.



## References

Anderson JP, Walker DE, Goldstein JM, de Laat R, Banducci K, Caccavello RJ, Barbour R, Huang J, Kling K, Lee M, Diep L, Keim PS, Shen X, Chataway T, Schlossmacher MG, Seubert P, Schenk D, Sinha S, Gai WP, Chilcote TJ (2006) Phosphorylation of Ser-129 is the dominant pathological modification of alpha-synuclein in familial and sporadic Lewy body disease. *J Biol Chem* **281**: 29739-29752

Bauer B, Davidson M, Orwar O (2009) Proteomic analysis of plasma membrane vesicles. *Angew Chem Int Ed Engl* **48**: 1656-1659

Beyer K, Ariza A (2013) alpha-Synuclein posttranslational modification and alternative splicing as a trigger for neurodegeneration. *Mol Neurobiol* **47**: 509-524

Cooper AA, Gitler AD, Cashikar A, Haynes CM, Hill KJ, Bhullar B, Liu K, Xu K, Strathearn KE, Liu F, Cao S, Caldwell KA, Caldwell GA, Marsischky G, Kolodner RD, Labaer J, Rochet JC, Bonini NM, Lindquist S (2006) Alpha-synuclein blocks ER-Golgi traffic and Rab1 rescues neuron loss in Parkinson's models. *Science* **313**: 324-328

de Oliveira RM, Vicente Miranda H, Francelle L, Pinho R, Szego EM, Martinho R, Munari F, Lazaro DF, Moniot S, Guerreiro P, Fonseca-Ornelas L, Marijanovic Z, Antas P, Gerhardt E, Enguita FJ, Fauvet B, Penque D, Pais TF, Tong Q, Becker S, Kugler S, Lashuel HA, Steegborn C, Zweckstetter M, Outeiro TF (2017) The mechanism of sirtuin 2-mediated exacerbation of alpha-synuclein toxicity in models of Parkinson disease. *PLoS Biol* **15**: e2000374

Diao J, Burre J, Vivona S, Cipriano DJ, Sharma M, Kyoung M, Sudhof TC, Brunger AT (2013) Native alpha-synuclein induces clustering of synaptic-vesicle mimics via binding to phospholipids and synaptobrevin-2/VAMP2. *Elife* **2**: e00592

Dikiy I, Eliezer D (2014) N-terminal acetylation stabilizes N-terminal helicity in lipid- and micelle-bound alpha-synuclein and increases its affinity for physiological membranes. *J Biol Chem* **289**: 3652-3665

Drazic A, Myklebust LM, Ree R, Arnesen T (2016) The world of protein acetylation. *Biochim Biophys Acta* **1864**: 1372-1401

Eliezer D, Kutluay E, Bussell R, Jr., Browne G (2001) Conformational properties of alpha-synuclein in its free and lipid-associated states. *J Mol Biol* **307**: 1061-1073

Fortin DL, Troyer MD, Nakamura K, Kubo S, Anthony MD, Edwards RH (2004) Lipid rafts mediate the synaptic localization of alpha-synuclein. *J Neurosci* **24**: 6715-6723

George JM, Jin H, Woods WS, Clayton DF (1995) Characterization of a novel protein regulated during the critical period for song learning in the zebra finch. *Neuron* **15**: 361-372

Goedert M (2001) Alpha-synuclein and neurodegenerative diseases. *Nat Rev Neurosci* **2**: 492-501

Guo JL, Lee VM (2014) Cell-to-cell transmission of pathogenic proteins in neurodegenerative diseases. *Nat Med* **20**: 130-138

Hitchcock-DeGregori SE, Heald RW (1987) Altered actin and troponin binding of amino-terminal variants of chicken striated muscle alpha-tropomyosin expressed in *Escherichia coli*. *J Biol Chem* **262**: 9730-9735

Holmes BB, DeVos SL, Kfoury N, Li M, Jacks R, Yanamandra K, Ouidja MO, Brodsky FM, Marasa J, Bagchi DP, Kotzbauer PT, Miller TM, Papy-Garcia D, Diamond MI (2013) Heparan sulfate proteoglycans mediate internalization and propagation of specific proteopathic seeds. *Proc Natl Acad Sci U S A* **110**: E3138-3147

Ihse E, Yamakado H, van Wijk XM, Lawrence R, Esko JD, Masliah E (2017) Cellular internalization of alpha-synuclein aggregates by cell surface heparan sulfate depends on aggregate conformation and cell type. *Sci Rep* **7**: 9008

Kamp F, Beyer K (2006) Binding of alpha-synuclein affects the lipid packing in bilayers of small vesicles. *J Biol Chem* **281**: 9251-9259

Kang L, Moriarty GM, Woods LA, Ashcroft AE, Radford SE, Baum J (2012) N-terminal acetylation of alpha-synuclein induces increased transient helical propensity and decreased aggregation rates in the intrinsically disordered monomer. *Protein Sci* **21**: 911-917

Kang L, Wu KP, Vendruscolo M, Baum J (2011) The A53T mutation is key in defining the differences in the aggregation kinetics of human and mouse alpha-synuclein. *J Am Chem Soc* **133**: 13465-13470

Kellie JF, Higgs RE, Ryder JW, Major A, Beach TG, Adler CH, Merchant K, Knierman MD (2014) Quantitative measurement of intact alpha-synuclein proteoforms from post-mortem control and Parkinson's disease brain tissue by intact protein mass spectrometry. *Sci Rep* **4**: 5797

LaRochelle JR, Cobb GB, Steinauer A, Rhoades E, Schepartz A (2015) Fluorescence correlation spectroscopy reveals highly efficient cytosolic delivery of certain penta-arg proteins and stapled peptides. *J Am Chem Soc* **137**: 2536-2541

Li P, Banjade S, Cheng HC, Kim S, Chen B, Guo L, Llaguno M, Hollingsworth JV, King DS, Banani SF, Russo PS, Jiang QX, Nixon BT, Rosen MK (2012) Phase transitions in the assembly of multivalent signalling proteins. *Nature* **483**: 336-340

Li XH, Rhoades E (2017) Heterogeneous Tau-Tubulin Complexes Accelerate Microtubule Polymerization. *Biophys J* **112**: 2567-2574

Luk KC, Song C, O'Brien P, Stieber A, Branch JR, Brunden KR, Trojanowski JQ, Lee VM (2009) Exogenous alpha-synuclein fibrils seed the formation of Lewy body-like intracellular inclusions in cultured cells. *Proc Natl Acad Sci U S A* **106**: 20051-20056

Mao X, Ou MT, Karuppagounder SS, Kam TI, Yin X, Xiong Y, Ge P, Umanah GE, Brahmachari S, Shin JH, Kang HC, Zhang J, Xu J, Chen R, Park H, Andrabi SA, Kang SU, Goncalves RA, Liang Y, Zhang S, Qi C, Lam S, Keiler JA, Tyson J, Kim D, Panicker N, Yun SP, Workman CJ, Vignali DA, Dawson VL, Ko HS, Dawson TM (2016) Pathological alpha-synuclein transmission initiated by binding lymphocyte-activation gene 3. *Science* **353**

Middleton ER, Rhoades E (2010) Effects of curvature and composition on alpha-synuclein binding to lipid vesicles. *Biophys J* **99**: 2279-2288

Milles S, Mercadante D, Aramburu IV, Jensen MR, Banterle N, Koehler C, Tyagi S, Clarke J, Shammass SL, Blackledge M, Grater F, Lemke EA (2015) Plasticity of an ultrafast interaction between nucleoporins and nuclear transport receptors. *Cell* **163**: 734-745

Moremen KW, Tiemeyer M, Nairn AV (2012) Vertebrate protein glycosylation: diversity, synthesis and function. *Nat Rev Mol Cell Biol* **13**: 448-462

Park DD, Xu G, Wong M, Phoomak C, Liu M, Haigh NE, Wongkham S, Yang P, Maverakis E, Lebrilla CB (2018) Membrane glycomics reveal heterogeneity and quantitative distribution of cell surface sialylation. *Chem Sci* **9**: 6271-6285

Rhoades E, Ramlall TF, Webb WW, Eliezer D (2006) Quantification of alpha-synuclein binding to lipid vesicles using fluorescence correlation spectroscopy. *Biophys J* **90**: 4692-4700

Schneider CA, Rasband WS, Eliceiri KW (2012) NIH Image to ImageJ: 25 years of image analysis. *Nat Methods* **9**: 671-675

Scott DC, Monda JK, Bennett EJ, Harper JW, Schulman BA (2011) N-terminal acetylation acts as an avidity enhancer within an interconnected multiprotein complex. *Science* **334**: 674-678

Sezgin E, Kaiser HJ, Baumgart T, Schwille P, Simons K, Levental I (2012) Elucidating membrane structure and protein behavior using giant plasma membrane vesicles. *Nat Protoc* **7**: 1042-1051

Shrivastava AN, Redeker V, Fritz N, Pieri L, Almeida LG, Spolidoro M, Liebmann T, Bousset L, Renner M, Lena C, Aperia A, Melki R, Triller A (2015) alpha-synuclein assemblies sequester neuronal alpha3-Na<sup>+</sup>/K<sup>+</sup>-ATPase and impair Na<sup>+</sup> gradient. *EMBO J* **34**: 2408-2423

Starheim KK, Gevaert K, Arnesen T (2012) Protein N-terminal acetyltransferases: when the start matters. *Trends Biochem Sci* **37**: 152-161

Theillet FX, Binolfi A, Bekei B, Martorana A, Rose HM, Stuver M, Verzini S, Lorenz D, van Rossum M, Goldfarb D, Selenko P (2016) Structural disorder of monomeric alpha-synuclein persists in mammalian cells. *Nature* **530**: 45-50

Trexler AJ, Rhoades E (2009) Alpha-synuclein binds large unilamellar vesicles as an extended helix. *Biochemistry* **48**: 2304-2306

Trexler AJ, Rhoades E (2012) N-Terminal acetylation is critical for forming alpha-helical oligomer of alpha-synuclein. *Protein Sci* **21**: 601-605

Tuttle MD, Comellas G, Nieuwkoop AJ, Covell DJ, Berthold DA, Kloepper KD, Courtney JM, Kim JK, Barclay AM, Kendall A, Wan W, Stubbs G, Schwieters CD, Lee VM, George JM, Rienstra CM (2016) Solid-state NMR structure of a pathogenic fibril of full-length human alpha-synuclein. *Nat Struct Mol Biol* **23**: 409-415

Urrea L, Ferrer I, Gavin R, Del Rio JA (2017) The cellular prion protein (PrP(C)) as neuronal receptor for alpha-synuclein. *Prion* **11**: 226-233

Van Holle S, De Schutter K, Eggermont L, Tsaneva M, Dang L, Van Damme EJM (2017) Comparative Study of Lectin Domains in Model Species: New Insights into Evolutionary Dynamics. *Int J Mol Sci* **18**

Varki A, Etzler ME, Cummings RD, Esko JD (2009) Discovery and Classification of Glycan-Binding Proteins. In *Essentials of Glycobiology*, Varki A, Cummings RD, Esko JD, Freeze HH, Stanley P, Bertozzi CR, Hart GW, Etzler ME (eds), 2nd edn. Cold Spring Harbor (NY)

Vicente Miranda H, Szego EM, Oliveira LMA, Breda C, Darendelioglu E, de Oliveira RM, Ferreira DG, Gomes MA, Rott R, Oliveira M, Munari F, Enguita FJ, Simoes T, Rodrigues EF, Heinrich M, Martins IC, Zamolo I, Riess O, Cordeiro C, Ponces-Freire A, Lashuel HA, Santos NC, Lopes LV, Xiang W, Jovin TM, Penque D, Engelender S, Zweckstetter M, Klucken J, Giorgini F, Quintas A, Outeiro TF (2017) Glycation potentiates alpha-synuclein-associated neurodegeneration in synucleinopathies. *Brain* **140**: 1399-1419

Volpicelli-Daley LA, Luk KC, Lee VM (2014) Addition of exogenous alpha-synuclein preformed fibrils to primary neuronal cultures to seed recruitment of endogenous alpha-synuclein to Lewy body and Lewy neurite-like aggregates. *Nat Protoc* **9**: 2135-2146

Wright PE, Dyson HJ (2015) Intrinsically disordered proteins in cellular signalling and regulation. *Nat Rev Mol Cell Biol* **16**: 18-29

Yap TL, Gruschus JM, Velayati A, Westbroek W, Goldin E, Moaven N, Sidransky E, Lee JC (2011) Alpha-synuclein interacts with Glucocerebrosidase providing a molecular link between Parkinson and Gaucher diseases. *J Biol Chem* **286**: 28080-28088

## Figure Legends

### Figure 1 – $\alpha$ S<sub>acetyl</sub> PFFs are more effective at inducing pathological aggregates in primary neurons.

A Representative images of aggregates of endogenous  $\alpha$ S in cultured mouse hippocampal neurons following incubation with  $\alpha$ S<sub>acetyl</sub> or  $\alpha$ S<sub>un</sub> PFFs. Images shown after 3 and 7 days following treatment with PFFs. Red:  $\alpha$ S-pS129 antibody; Blue:  $\beta$ III-tubulin antibody.

B Quantification of  $\alpha$ S aggregates formed from images in (A). Aggregates in neurons treated with  $\alpha$ S<sub>acetyl</sub> PFFs are larger and more numerous.

Data information: n=80 neurons, 3 independent experiments, \*P<0.01, \*\*P<0.001 and \*\*\*P<0.0001 by the Student's T-Test compared to  $\alpha$ S<sub>un</sub> PFF treated neurons. The data are presented as mean $\pm$ SD, n=3. Scale bars=20  $\mu$ m.

### Figure 2 –Complex N-linked glycans selectively enhance uptake of $\alpha$ S<sub>acetyl</sub> by SH-SY5Y cells.

A Representative images of SH-SY5Y cells following 12h incubation with monomer or PFF  $\alpha$ S<sub>acetyl</sub>-AL488, +/- PNGase F treatment.

B As in (A) but for monomer or PFF  $\alpha$ S<sub>un</sub>-AL488.

C Upper: Kinetics of internalization by SH-SY5Y cells of monomer  $\alpha$ S as quantified by loss from extracellular medium by FCS, +/- PNGase F treatment. Lower: Kinetics of internalization by SH-SY5Y cells of PFF  $\alpha$ S as quantified by puncta analysis of confocal images, +/- PNGase F treatment.

D Quantification of internalization of  $\alpha$ S PFFs by SH-SY5Y cells, +/- Heparinase I/III treatment. Images collected following 12 h incubation with protein and quantified by puncta analysis.

E Quantification of internalization of  $\alpha$ S monomer and PFF by SH-SY5Y cells, +/- PNGase F treatment. Images collected following 12 h incubation with protein and quantified by puncta analysis.

Data information: All protein uptake measurements with 200 nM monomer or 200 nM PFFs (monomer units, 20:1  $\alpha$ S: $\alpha$ S-AL488) ; n=100 cells, 3 independent experiments, \*P<0.01, \*\*P<0.001 and \*\*\*P<0.0001 by the Student's T-Test). Scale bars=20  $\mu$ m.

**Figure 3 – Complex N-linked glycans selectively enhance uptake of  $\alpha S_{\text{acetyl}}$  by primary hippocampal neurons.**

A Representative images of mouse hippocampal neurons cells following 12h incubation with monomer or PFF  $\alpha S_{\text{acetyl}}$ -AL488, +/- PNGase F treatment. Uptake quantified by total cellular fluorescence.

B As in (A) but for monomer and PFF  $\alpha S_{\text{un}}$ -AL488.

Data information: All internalization measurements with 200 nM monomer or 200 nM PFF (monomer units, 20:1  $\alpha S$ : $\alpha S$ -AL488) ; n=100 cells, 3 independent experiments, \*P<0.01, \*\*P<0.001 and \*\*\*P<0.0001 by the Student's T-Test). Scale bars=20  $\mu\text{m}$ .

**Figure 4 – Removal of N-linked glycans disrupts binding of  $\alpha S_{\text{acetyl}}$  to SH-SY5Y proteoliposomes.**

A Images of SH-SY5Y GPMVs incubated with 100 nM  $\alpha S_{\text{acetyl}}$ -AL488 and unlabeled  $\alpha S_{\text{acetyl}}$  (concentrations indicated).

B Upper: As in (A) but with 100 nM  $\alpha S_{\text{un}}$ -AL488 and 80  $\mu\text{M}$  unlabeled  $\alpha S_{\text{un}}$ . Lower: As in upper panel but with treatment with PNGase F.

C Binding of 80 nM  $\alpha S_{\text{acetyl}}$ -AL488 or  $\alpha S_{\text{un}}$ -AL488 to GPMVs quantified by FCS as loss of protein (N, number of molecules) from solution. The number of molecules in control wells lacking GPMVs is indicated by the red-dashed line.

D Representative images of SH-SY5Y GPMVs incubated with 100 nM  $\alpha S_{\text{acetyl}}$ -AL488 and 80  $\mu\text{M}$  unlabeled  $\alpha S_{\text{acetyl}}$  after treatment of GPMVs with the indicated endoglycosidase.

E Binding of  $\alpha S_{\text{acetyl}}$ -AL488 to Heparinase- and Endo H-treated SH-SY5Y GPMVs measured by FCS, as in panel C. Binding +/- PNGase F from panel C shown for comparison.

F GPMVs incubated with 50 nM conA-AL488 in the absence and presence of 100 nM  $\alpha S_{\text{acetyl}}$ -AL594 and 80  $\mu\text{M}$  of unlabeled  $\alpha S_{\text{acetyl}}$ .

Data information: The data are presented as mean $\pm$ SD, n=3. Scale bars=20  $\mu\text{m}$ .

**Figure 5. Intramolecular FLIM-FRET measurements of  $\alpha S$  bound to SH-SY5Y GPMVs.**

A FLIM-FRET measurements of  $\alpha S_{\text{acetyl}}$  bound to GPMVs without (upper) and with (lower) treatment with PNGase F Left: Representative image of a GPMV, colored by donor fluorophore lifetime shown in the scale bar. Right: Histogram of  $ET_{\text{eff}}$  calculated from the images, with Gaussian fits shown. The pixels used to calculate the histograms are indicated by dashed lines on the GPMV images.

B As in (A) but with  $\alpha S_{\text{un}}$ .

Data information: Histograms indicated are an average of three GPMVs per biological replicate (n=3).

### **Figure 6 - Binding of $\alpha S_{\text{acetyl}}$ to isolated cell surface N-linked glycans.**

A Diffusion time of  $\alpha S_{\text{acetyl}}$ -AL488 and  $\alpha S_{\text{un}}$ -AL488 (80 nM) as a function of PNGase F-derived glycan concentration.

B Comparison of  $\alpha S_{\text{acetyl}}$ -AL488 and  $\alpha S_{\text{un}}$ -AL488 binding to carbohydrates (30  $\mu\text{g}$ ) cleaved by the indicated endoglycosidases.

C (left) Percent increase in peak intensity for selected residues strongly enhanced by glycan binding and (right) cross-sections from  $^{15}\text{N}$ - $^1\text{H}$  HSQC spectra along the nitrogen dimension at 8.15 ppm for  $\alpha S_{\text{acetyl}}$  in the absence (gray) and in the presence of PNGase F-derived glycans (orange).

Data information: For (A-C), data are presented as mean $\pm$ S.D., n=3. \*P<0.01, \*\*P<0.001 and \*\*\*P<0.0001 by the Student's T-Test).

### **Figure 7 – Glycosylated neurexin 1 $\beta$ is a receptor for $\alpha S_{\text{acetyl}}$ .**

A HEK cells transfected with LAG3-GFP after incubation with monomer or PFF  $\alpha S_{\text{acetyl}}$ -AL594 or PFF  $\alpha S_{\text{un}}$ -AL594

B HEK cells transfected with LAG3-GFP but cells treated with PNGase F prior to incubation with monomer or PFF  $\alpha S_{\text{acetyl}}$ -AL594 or PFF  $\alpha S_{\text{un}}$ -AL594.

C Quantification of uptake of monomer and PFF  $\alpha S$ -AL594 by LAG3-GFP transfected HEK cells and +/- PNGase F treatment quantified by puncta analysis (for  $\alpha S_{\text{acetyl}}$  and  $\alpha S_{\text{un}}$  PFFs).

D As in (A) but HEK cells transfected with neurexin 1 $\beta$ -GFP.

E As in (B) but HEK cells transfected with neurexin 1 $\beta$ -GFP.

F As in (C) but HEK cells transfected with neurexin 1 $\beta$ -GFP.

**A**

— PFF —  
 overlay     $\alpha$ S-S129Phos     $\beta$ III tubulin

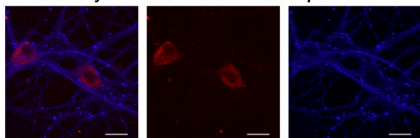

+ $\alpha$ S<sup>PFF</sup><sub>acetyl</sub>

day 3

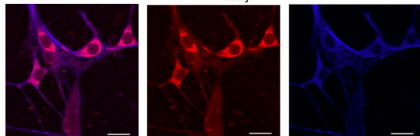

day 7

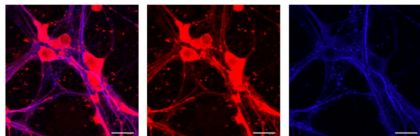

+ $\alpha$ S<sup>PFF</sup><sub>un</sub>

day 3

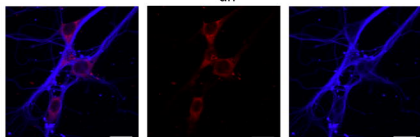

day 7

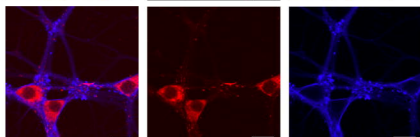**B**

Total pixel area of aggregates per neuron

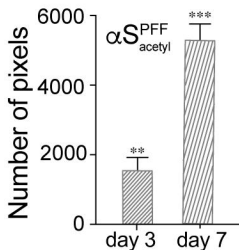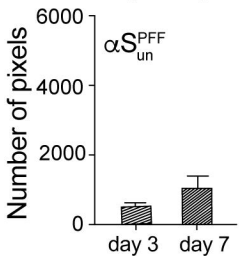

Source: http://biorxiv.org/content/10.1101/407247v2.full.pdf
